# Supplementary material for: Clinical utility of metagenomic next-generation sequencing in pathogen detection for lower respiratory tract infections and impact on clinical outcomes in southernmost China
Source: PubMed Central journal article supplement (PMC10739398; doi:10.3389/fcimb.2023.1271952), 2023-12-08
Supplement: DataSheet_1.pdf [file DataSheet_1.pdf]

## Supplementary Material

Clinical Utility of Metagenomic Next-Generation Sequencing in Pathogen Detection for Lower Respiratory Tract Infections and Impact on Clinical Outcomes in Southernmost China.

Jinxiang Hao<sup>1†</sup>, Weili Li<sup>2†</sup>, Yaoyao Wang<sup>2</sup>, Jiangman Zhao<sup>2</sup>, Yu Chen<sup>1\*</sup>

<sup>1</sup>Department of Respiratory and Critical Care Medicine, Haikou Third People's Hospital, Haikou, Hainan, China

<sup>2</sup>Zhangjiang Center for Translational Medicine, Shanghai Biotecan Pharmaceuticals Co., Ltd., Shanghai, China

<sup>†</sup>These authors contributed equally to this work and shared first authorship.

\* **Correspondence:**

Yu Chen

chyy95@126.com

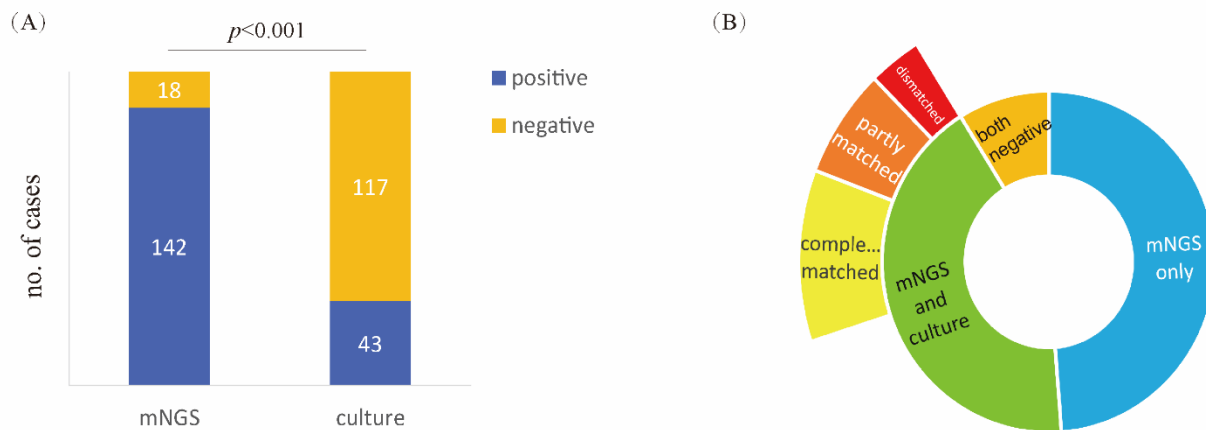

**Supplementary Figure 1.** Comparison of diagnostic performance of mNGS and culture with BALF samples (n=160). (A) Comparison of positive rates between mNGS and culture in a pairwise manner. (B) Concordance of mNGS and culture results.
